# Supplementary material
Source: PubMed Central journal article supplement (PMC3695050)

# Supplementary Figure 1

A

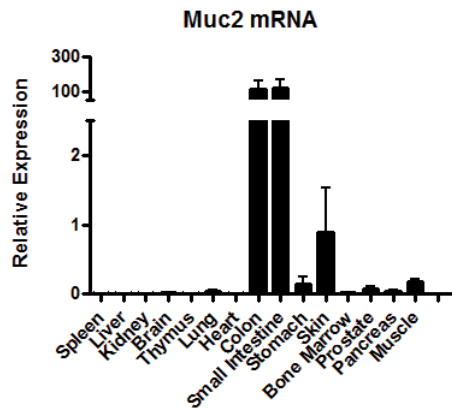

B

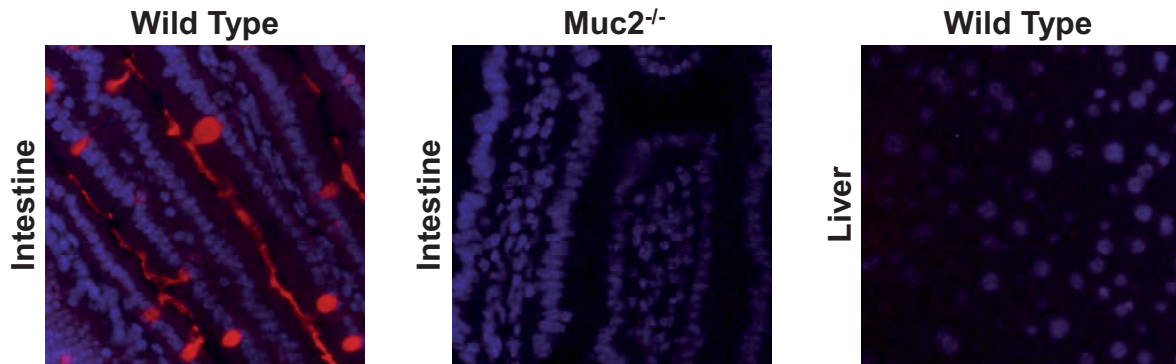

# Supplementary Figure 2

## A

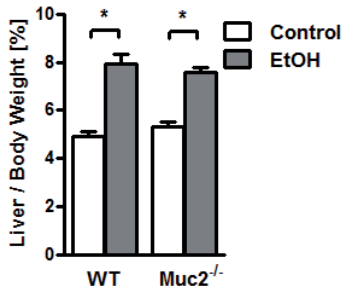

## B

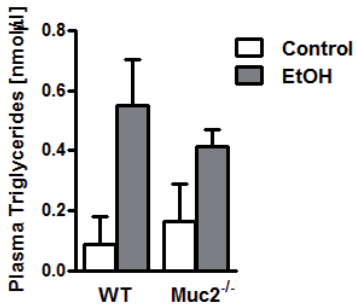

# Supplementary Figure 3

**A**

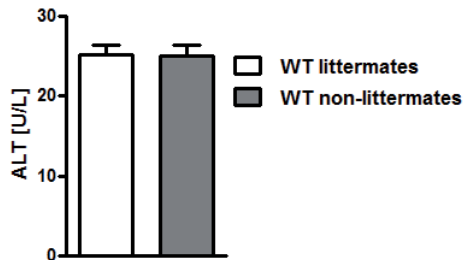

**B**

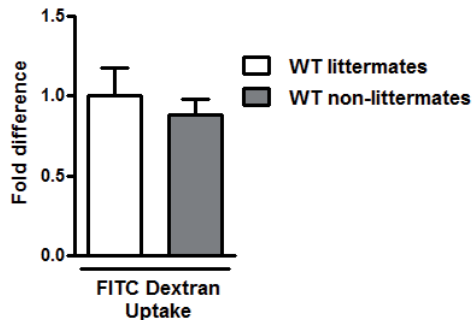

**C**

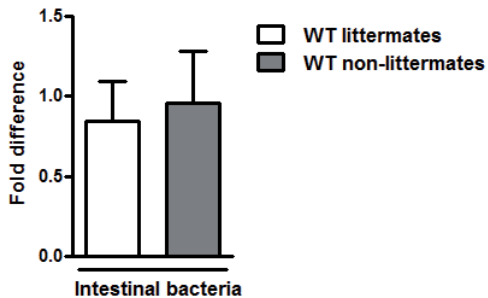

**D**

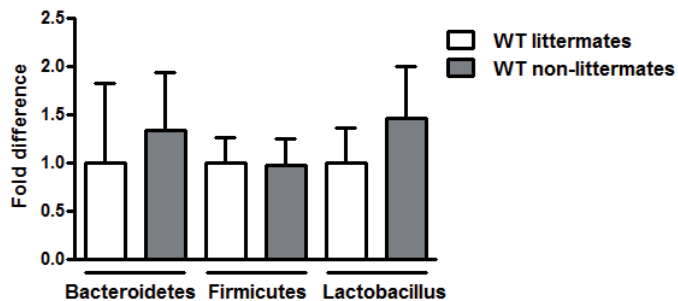

# Supplementary Figure 4

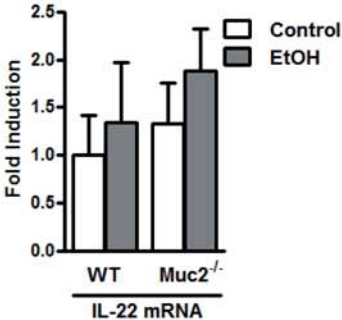

# Supplementary Figure 5

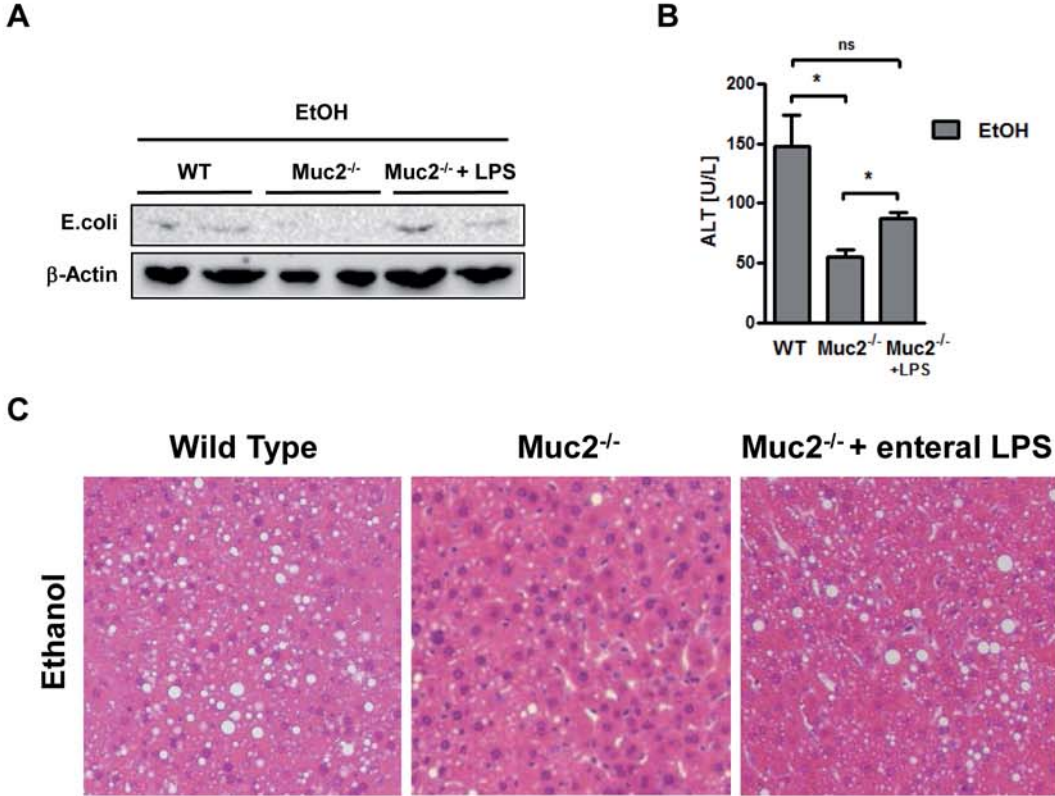

Supplement: NIHMS447064-supplement-Supp_Fig_S1-S5.pdf [file NIHMS447064-supplement-Supp_Fig_S1-S5.pdf]
